# Supplementary material for: Allosteric modulation of GPCR-induced β-arrestin trafficking and signaling by a synthetic intrabody
Source: PubMed Central journal article supplement (PMC9360436; doi:10.1038/s41467-022-32386-x), 2022-08-08
Supplement: 41467_2022_32386_MOESM1_ESM.pdf [file 41467_2022_32386_MOESM1_ESM.pdf]

## Supplementary information

---

### Allosteric modulation of GPCR-induced $\beta$ -arrestin trafficking and signaling by a synthetic intrabody

Mithu Baidya<sup>1#</sup>, Madhu Chaturvedi<sup>1#</sup>, Hemlata Dwivedi-Agnihotri<sup>1#</sup>, Ashutosh Ranjan<sup>1</sup>, Dominic Devost<sup>2</sup>, Yoon Namkung<sup>3</sup>, Tomasz Maciej Stepniewski<sup>4,5</sup>, Shubhi Pandey<sup>1</sup>, Minakshi Baruah<sup>1</sup>, Bhanupriya Panigrahi<sup>1</sup>, Parishmita Sarma<sup>1</sup>, Manish K. Yadav<sup>1</sup>, Jagannath Maharana<sup>1</sup>, Ramanuj Banerjee<sup>1</sup>, Kouki Kawakami<sup>6</sup>, Asuka Inoue<sup>6</sup>, Jana Selent<sup>4</sup>, Stéphane A. Laporte<sup>2,3</sup>, Terence E. Hébert<sup>2</sup> and Arun K. Shukla<sup>1\*</sup>

- Supplementary Figure 1
- Supplementary Figure 2
- Supplementary Figure 3
- Supplementary Figure 4
- Supplementary Figure 5
- Supplementary Figure 6

**a**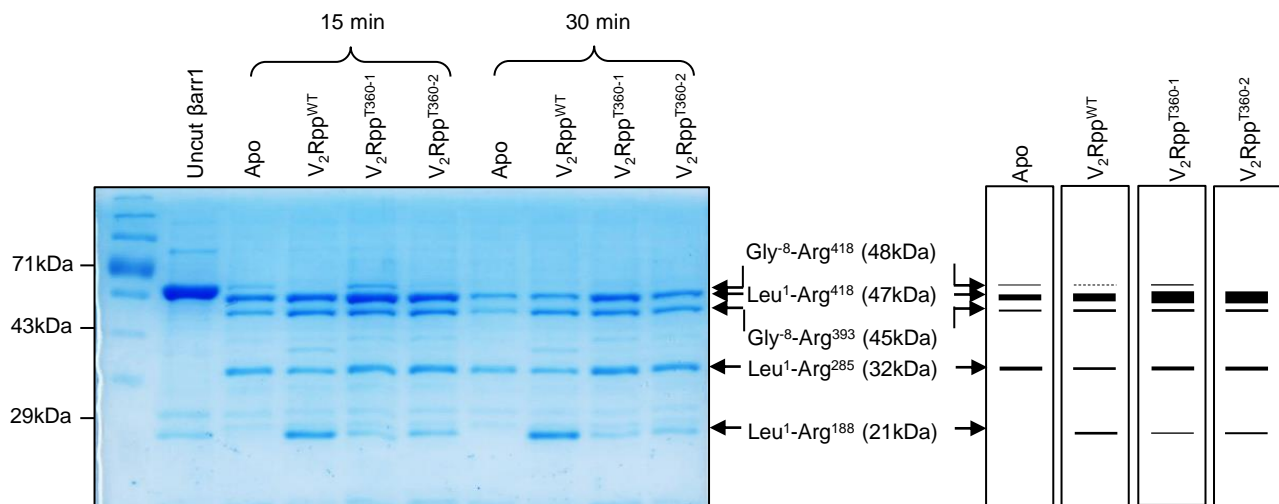**b**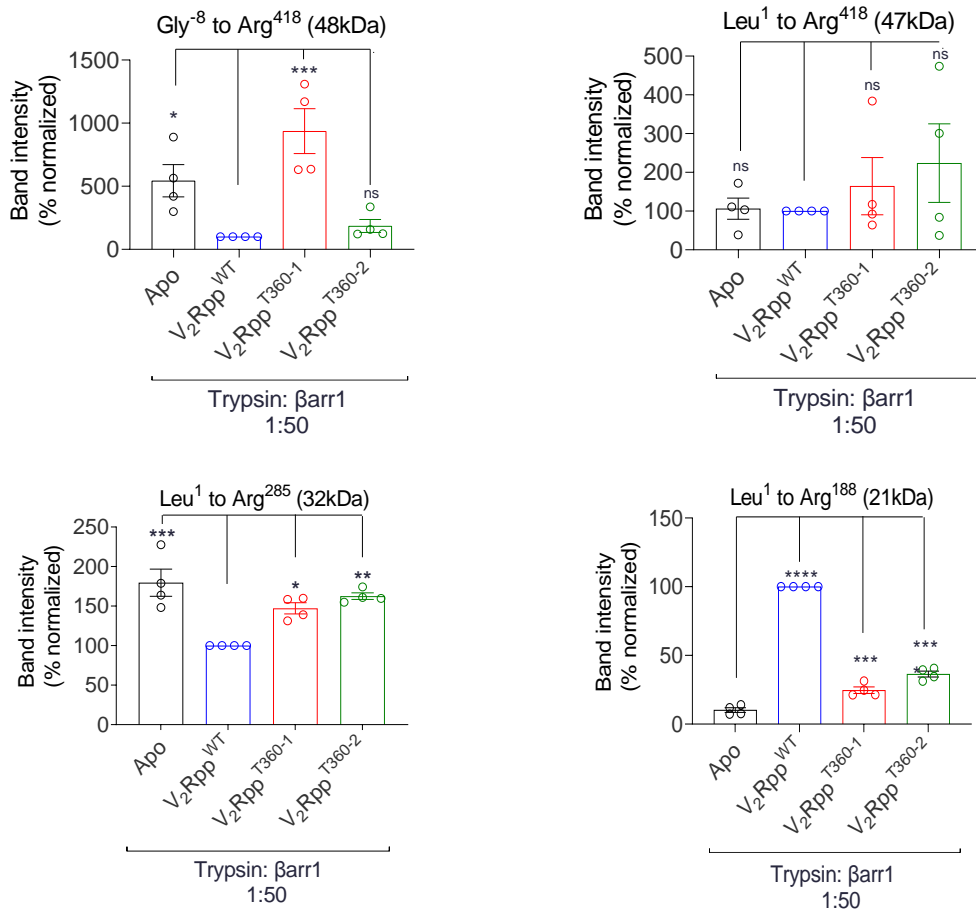

**Supplementary Figure 1. Limited trypsin proteolysis of  $\beta$ arr1:** (a) The trypsin digestion pattern of  $V_2Rpp^{WT}$ ,  $V_2Rpp^{T360-1}$  or  $V_2Rpp^{T360-2}$  bound  $\beta$ arr1 is shown at indicated time points.  $\beta$ arr1 activated with 50-fold molar excess of different phosphopeptides was subjected to limited trypsin proteolysis at a trypsin:  $\beta$ arr1 ratio of 1:50. The proteolysis reaction was quenched with SDS buffer after 15 and 30min, and the digested fragments were separated by SDS-PAGE. There are evident differences in the fragments (Leu<sup>1</sup>-Arg<sup>418</sup> and Leu<sup>1</sup>-Arg<sup>188</sup>) resulting from digestion of ligand-free and ligand bound ( $V_2Rpp^{WT}$ ,  $V_2R^{T360-1}$  or  $V_2Rpp^{T360-2}$ )  $\beta$ arr1. (b). Densitometry based quantification (mean $\pm$ SEM) of the band intensities for different tryptic fragments generated from  $\beta$ arr1 at 15min time-point. Data from four independent experiments, normalized with respect to  $V_2R^{WT}$  condition, and analyzed using One-way ANOVA (mean $\pm$ SEM; Dunnett's multiple comparisons test) is presented here. The exact p values are as follows: Gly<sup>8</sup> to Arg<sup>418</sup> (48kDa) band- Apo (p= 0.041),  $V_2R^{T360-1}$  (p= 0.0006),  $V_2R^{T360-2}$  (p=0.909); Leu<sup>1</sup> to Arg<sup>418</sup> (47kDa) band- Apo(p=0.9997),  $V_2R^{T360-1}$  (p= 0.8193),  $V_2R^{T360-2}$  (p=0.4146); Leu<sup>1</sup> to Arg<sup>285</sup> (32kDa) band- Apo(p=0.0002),  $V_2R^{T360-1}$  (p= 0.0113),  $V_2R^{T360-2}$  (p=0.0015); Leu<sup>1</sup> to Arg<sup>188</sup> (21kDa) band- Apo,  $V_2R^{T360-1}$ ,  $V_2R^{T360-2}$  (p<0.0001). Source data are provided as a Source Data file (\*p<0.05, \*\*p<0.01, \*\*\*p<0.001, \*\*\*\* p<0.0001).

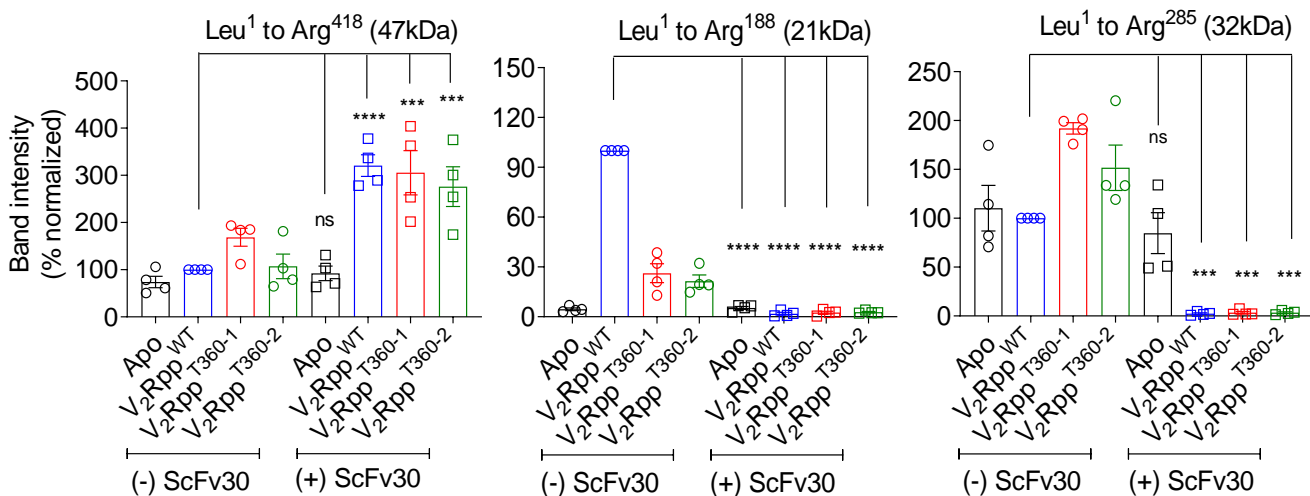

**Supplementary Figure 2.** Densitometry based quantification (mean±SEM) of trypsin fragments corresponding to 47kDa (Leu<sup>1</sup>-Arg<sup>418</sup>), 32kDa (Leu<sup>1</sup>-Arg<sup>285</sup>) and 21kDa (Leu<sup>1</sup>-Arg<sup>188</sup>) generated in presence and absence of ScFv30 is shown (based on data presented in Figure 2E). Data from four independent experiments, normalized with respect to V<sub>2</sub>R<sup>WT</sup>- without ScFv30 condition, and analyzed using One-way ANOVA (mean±SEM; Dunnett's multiple comparisons test) is presented here. The exact p values are as follows: Leu<sup>1</sup> to Arg<sup>418</sup> (47kDa) band- Apo (p=0.9997), V<sub>2</sub>R<sup>WT</sup> (p < 0.0001), V<sub>2</sub>R<sup>T360-1</sup> (p = 0.0001), V<sub>2</sub>R<sup>T360-2</sup> (p = 0.0008); Leu<sup>1</sup> to Arg<sup>188</sup> (21kDa) band- Apo, V<sub>2</sub>R<sup>WT</sup>, V<sub>2</sub>R<sup>T360-1</sup>, V<sub>2</sub>R<sup>T360-2</sup> (p < 0.0001); Leu<sup>1</sup> to Arg<sup>285</sup> (32kDa) band- Apo (p=0.9503), V<sub>2</sub>R<sup>WT</sup> (p=0.0003), V<sub>2</sub>R<sup>T360-1</sup> (p = 0.0003), V<sub>2</sub>R<sup>T360-2</sup> (p = 0.0004). Source data are provided as a Source Data file. (\*\*\*) p < 0.001, (\*\*\*\*) p < 0.0001

| 4JQI        |                             |              | 7DFA        |                             |              |
|-------------|-----------------------------|--------------|-------------|-----------------------------|--------------|
| Residue     | Interacting partner residue | Distance (Å) | Residue     | Interacting partner residue | Distance (Å) |
| 188 ARG N   | 197 LEU C                   | 4.00         | 188 ARG CG  | 190 PHE CE1                 | 3.68         |
| 188 ARG N   | 197 LEU O                   | 2.90         | 188 ARG CG  | 190 PHE CZ                  | 3.63         |
| 188 ARG CA  | 197 LEU O                   | 3.84         | 188 ARG NE  | 190 PHE CE1                 | 3.97         |
| 188 ARG C   | 197 LEU N                   | 3.90         | 188 ARG NH2 | 341 SER CA                  | 3.95         |
| 188 ARG O   | 196 PRO CA                  | 3.42         | 188 ARG NH2 | 340 SER O                   | 3.17         |
| 188 ARG O   | 196 PRO C                   | 3.58         |             |                             |              |
| 188 ARG O   | 197 LEU N                   | 2.77         |             |                             |              |
| 188 ARG O   | 197 LEU CA                  | 3.73         |             |                             |              |
| 188 ARG O   | 197 LEU O                   | 3.76         |             |                             |              |
| 188 ARG O   | 197 LEU CB                  | 3.81         |             |                             |              |
| 188 ARG O   | 190 PHE N                   | 3.99         |             |                             |              |
| 188 ARG O   | 196 PRO CB                  | 3.72         |             |                             |              |
| 188 ARG CB  | 197 LEU O                   | 3.94         |             |                             |              |
| 188 ARG CB  | 343 VAL CG2                 | 3.57         |             |                             |              |
| 188 ARG CG  | 190 PHE CZ                  | 3.57         |             |                             |              |
| 188 ARG CG  | 343 VAL CG2                 | 3.83         |             |                             |              |
| 188 ARG CG  | 190 PHE CE1                 | 3.52         |             |                             |              |
| 188 ARG NH1 | 341 SER C                   | 3.84         |             |                             |              |
| 188 ARG NH1 | 341 SER O                   | 3.84         |             |                             |              |
| 188 ARG NH1 | 342 ASP C                   | 3.89         |             |                             |              |
| 188 ARG NH1 | 342 ASP O                   | 2.78         |             |                             |              |
| 188 ARG NH2 | 340 SER O                   | 3.07         |             |                             |              |
| 285 ARG N   | 283 GLU C                   | 3.43         | 285 ARG CB  | 130 GLN O                   | 3.98         |
| 285 ARG N   | 283 GLU O                   | 3.13         | 285 ARG CG  | 130 GLN O                   | 3.55         |
| 285 ARG CA  | 130 GLN O                   | 3.45         | 285 ARG CG  | 132 GLY N                   | 3.66         |
| 285 ARG C   | 130 GLN O                   | 3.58         | 285 ARG CD  | 132 GLY CA                  | 3.85         |
| 285 ARG C   | 287 LEU N                   | 3.27         | 285 ARG CD  | 132 GLY N                   | 3.55         |
| 285 ARG O   | 336 GLY CA                  | 3.91         | 285 ARG CD  | 135 ASP OD2                 | 3.31         |
| 285 ARG O   | 287 LEU N                   | 3.55         | 285 ARG NE  | 135 ASP CG                  | 3.70         |
| 285 ARG O   | 335 LEU C                   | 3.80         | 285 ARG NE  | 135 ASP OD1                 | 3.53         |
| 285 ARG O   | 335 LEU O                   | 3.47         | 285 ARG NE  | 135 ASP OD2                 | 3.04         |
| 285 ARG O   | 338 LEU CG                  | 3.51         | 285 ARG CZ  | 333 GLY O                   | 3.58         |
| 285 ARG O   | 338 LEU CD1                 | 3.50         | 285 ARG NH1 | 336 GLY CA                  | 3.58         |
| 285 ARG CB  | 130 GLN O                   | 3.89         | 285 ARG NH1 | 336 GLY N                   | 3.89         |
| 285 ARG CG  | 130 GLN O                   | 3.26         | 285 ARG NH1 | 333 GLY O                   | 3.47         |
| 285 ARG CG  | 131 PRO C                   | 3.86         | 285 ARG NH2 | 135 ASP OD1                 | 3.82         |
| 285 ARG CG  | 132 GLY N                   | 3.61         | 285 ARG NH2 | 333 GLY O                   | 3.04         |
| 285 ARG CD  | 336 GLY CA                  | 3.80         |             |                             |              |
| 285 ARG CD  | 333 GLY O                   | 3.29         |             |                             |              |
| 285 ARG CD  | 336 GLY N                   | 3.88         |             |                             |              |
| 285 ARG NE  | 333 GLY O                   | 3.41         |             |                             |              |
| 285 ARG CZ  | 333 GLY O                   | 3.64         |             |                             |              |
| 285 ARG NH1 | 135 ASP CG                  | 3.99         |             |                             |              |
| 285 ARG NH1 | 135 ASP OD1                 | 3.85         |             |                             |              |
| 285 ARG NH1 | 135 ASP OD2                 | 3.33         |             |                             |              |
| 285 ARG NH1 | 333 GLY O                   | 3.72         |             |                             |              |

**Supplementary Figure 3.** Inter residue contacts (within 4Å) corresponding to residues Arg<sup>188</sup> and Arg<sup>285</sup> of 4JQI and 7DFA; calculated separately using CONTACT/ACT program within the CCP4 suite.

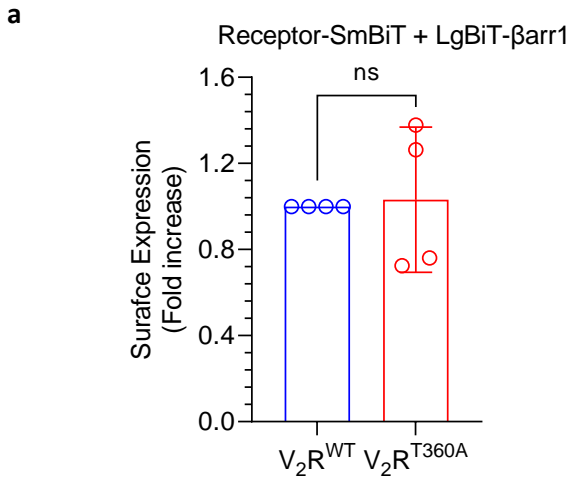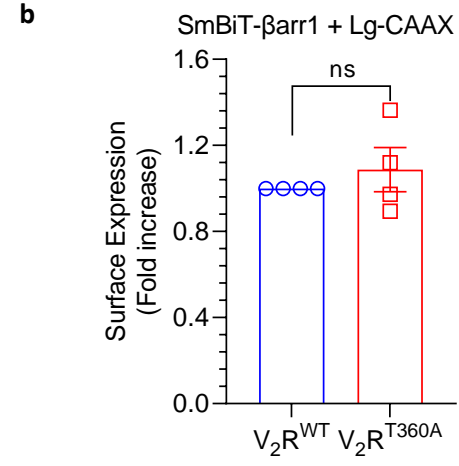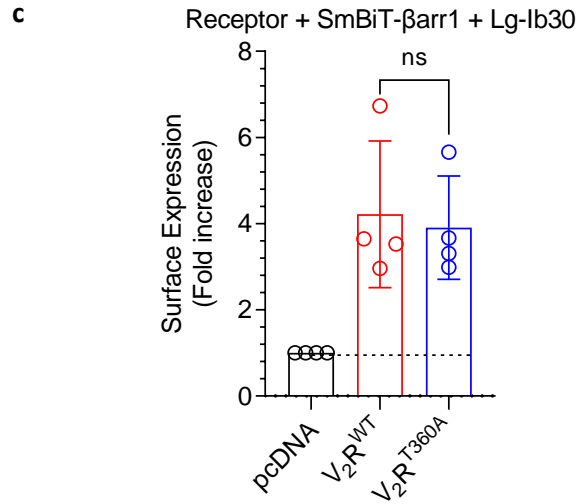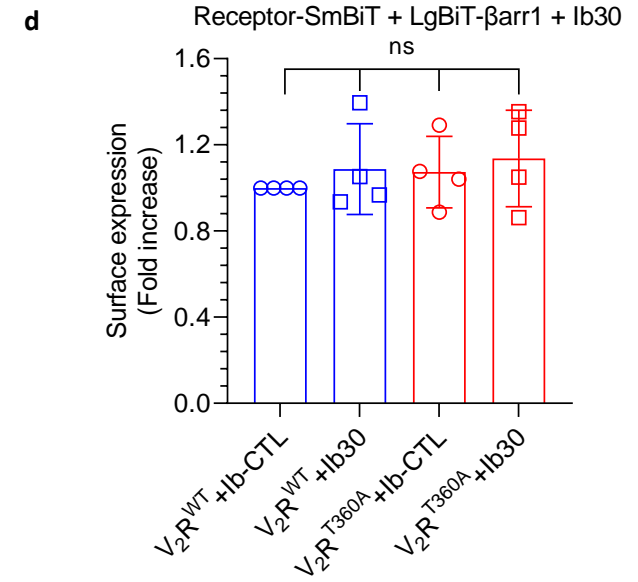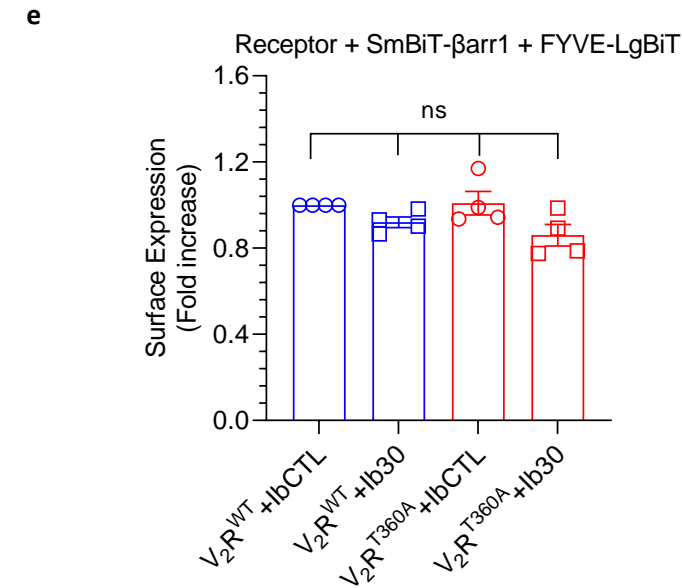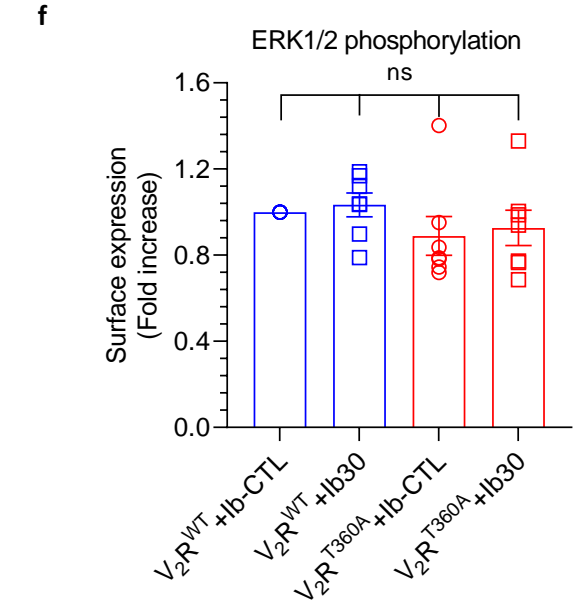

**Supplementary Figure 4. Surface expression of V<sub>2</sub>R constructs in different assays. (a-e)** Surface expression of V<sub>2</sub>R constructs in the NanoBiT assay as measured using whole cell ELISA, normalized with respect to V<sub>2</sub>R<sup>WT</sup> (treated as 100%), and analyzed using paired t-test (mean±SEM from four independent experiments, ns, non-significant). **(f).** Surface expression of V<sub>2</sub>R constructs in ERK1/2 phosphorylation assays as measured using whole cell ELISA, normalized with respect to vector-transfected cells (treated as 1), and analyzed using One-way ANOVA (mean±SEM from seven independent experiments, Sidak's multiple comparisons test ns, non-significant). Source data are provided as a Source Data file.

**a**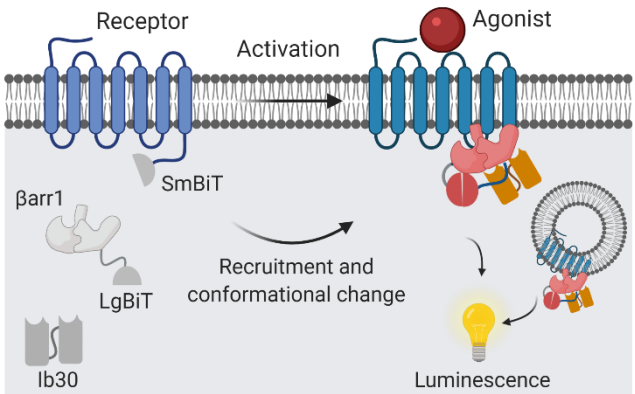**b**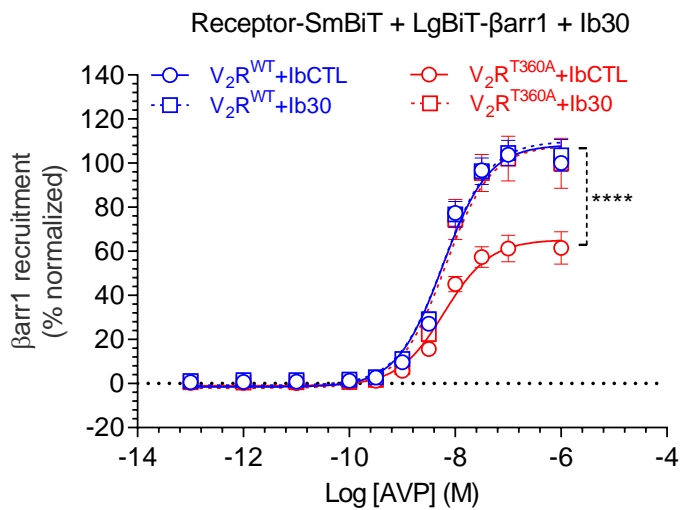

**Supplementary Figure 5. (a)** Schematic representation of NanoBiT-based βarr1 recruitment assay (created with BioRender.com). **(b)** HEK-293 cells expressing the indicated receptor and βarr1 constructs together with Ib-CTL or Ib30 were stimulated with varying doses of AVP for 30min followed by the measurement of luminescence (mean±SEM from four independent experiments; normalized with luminescence signal for V<sub>2</sub>R<sup>WT</sup> at maximal ligand dose as 100%) (Two-way ANOVA, Tukey's multiple comparisons test; \*\*\*\*p<0.0001). Source data are provided as a Source Data file.



**a**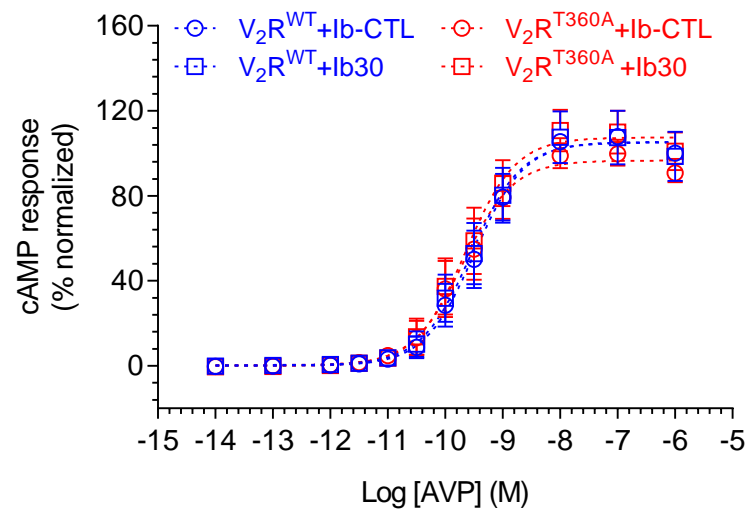**b**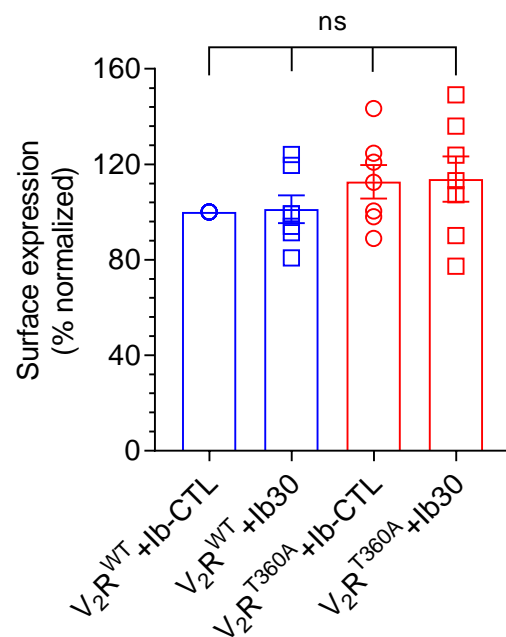

**Supplementary Figure 6. Effect of Intrabody30 (Ib30) on agonist-induced cAMP response.** (a) Ib30 does not affect agonist-induced cAMP response for the  $V_2R$  constructs as assessed using GloSensor assay. HEK-293 cells expressing the indicated constructs were stimulated with AVP followed by measurement of cAMP using luminescence-based readout. Data (mean $\pm$ SEM) from seven independent experiments are presented here. (b). Surface expression of  $V_2R$  constructs in GloSensor assay as measured using whole cell ELISA (mean  $\pm$ SEM, from seven independent experiments, One-way ANOVA, Dunnett's multiple comparison test). Source data are provided as a Source Data file.
